# MES-1, a protein required for unequal divisions of the germline in early *C. elegans* embryos, resembles receptor tyrosine kinases and is localized to the boundary between the germline and gut cells

Laura A. Berkowitz<sup>\*,†</sup> and Susan Strome

Department of Biology, Jordan Hall, 1001 E. Third St., Indiana University, Bloomington, IN 47405-3700, USA

<sup>\*</sup>Present address: Department of Biological Sciences, University of Tulsa, Tulsa, OK 74104, USA

<sup>†</sup>Author for correspondence (e-mail: laura-berkowitz@utulsa.edu)

Accepted 26 July; published on WWW 26 September 2000

## SUMMARY

During *Caenorhabditis elegans* embryogenesis the primordial germ cell, P<sub>4</sub>, is generated via a series of unequal divisions. These divisions produce germline blastomeres (P<sub>1</sub>, P<sub>2</sub>, P<sub>3</sub>, P<sub>4</sub>) that differ from their somatic sisters in their size, fate and cytoplasmic content (e.g. germ granules). *mes-1* mutant embryos display the striking phenotype of transformation of P<sub>4</sub> into a muscle precursor, like its somatic sister. A loss of polarity in P<sub>2</sub> and P<sub>3</sub> cell-specific events underlies the *Mes-1* phenotype. In *mes-1* embryos, P<sub>2</sub> and P<sub>3</sub> undergo symmetric divisions and partition germ granules to both daughters. This paper shows that *mes-1* encodes a receptor tyrosine kinase-like protein, though it lacks several residues conserved in all kinases and therefore is predicted not to have kinase activity. Immunolocalization analysis shows that MES-1 is present in four- to 24-cell embryos, where it is localized in a crescent at the junction between the germline cell and its neighboring gut cell. This is the region of P<sub>2</sub> and P<sub>3</sub> to

which the spindle and P granules must move to ensure normal division asymmetry and cytoplasmic partitioning. Indeed, during early stages of mitosis in P<sub>2</sub> and P<sub>3</sub>, one centrosome is positioned adjacent to the MES-1 crescent. Staining of isolated blastomeres demonstrated that MES-1 was present in the membrane of the germline blastomeres, consistent with a cell-autonomous function. Analysis of MES-1 distribution in various cell-fate and patterning mutants suggests that its localization is not dependent on the correct fate of either the germline or the gut blastomere but is dependent upon correct spatial organization of the embryo. Our results suggest that MES-1 directly positions the developing mitotic spindle and its associated P granules within P<sub>2</sub> and P<sub>3</sub>, or provides an orientation signal for P<sub>2</sub>- and P<sub>3</sub>-specific events.

Key words: *C. elegans*, MES-1, Germline, Asymmetric division, Mitotic spindle, P granules

## INTRODUCTION

Asymmetric localization of cytoplasmic factors and unequal cell division are fundamental to the development of all eukaryotes. When these mechanisms are used to generate distinct daughter cells during development, the two events must be coordinately regulated, to ensure the proper segregation of factors to each daughter. This is observed in such diverse systems as bud formation in the yeast *Saccharomyces cerevisiae* and neurogenesis in *Drosophila* (Madden and Snyder, 1998; Hawkins and Garriga, 1998; Jan and Jan, 2000; Schweisguth, 2000). As these events have become better understood, it has become apparent that many molecular components of cellular asymmetry are conserved (Drubin and Nelson, 1996; Shulman et al., 2000). Thus, elucidating new players and mechanisms for guiding asymmetric events can provide insights that extend beyond the system of study.

Early *C. elegans* embryos provide an ideal system in which to study asymmetry. These embryos undergo a series of stem-cell-like asymmetric divisions to establish the germline and

somatic founder cells. The one-cell zygote, P<sub>0</sub>, divides to form a large somatic cell, AB, and a smaller germline cell, P<sub>1</sub> (Deppe et al., 1978; Sulston et al., 1983). P<sub>1</sub> and its daughter (P<sub>2</sub>) and granddaughter (P<sub>3</sub>) each divide asymmetrically to generate a somatic and a germline cell. The last of these divisions generates the primordial germ cell, P<sub>4</sub>. Besides the difference in size, the germline cells (P<sub>1</sub>, P<sub>2</sub>, P<sub>3</sub>, P<sub>4</sub>) differ from their somatic sisters in their fate, in the timing of their subsequent divisions and in their cytoplasmic content. The latter is strikingly illustrated by the presence of P granules, cytoplasmic structures that are specifically segregated to the germline cell at each division and that are required for fertility (Strome and Wood, 1982; Kawasaki et al., 1998).

Many of the components required for early *C. elegans* asymmetry have been elucidated. In the newly fertilized embryo, the sperm entry point specifies the posterior end (Goldstein and Hird, 1996). The sperm component(s) that accomplishes this has not yet been identified, but likely candidates are the centrosomes and their associated microtubules, which may cause cytoplasmic and cortical

rearrangements that generate polarity in P<sub>0</sub>. The microfilament cytoskeleton is required for both correct P-granule segregation and unequal division in the one-cell embryo; embryos in which the microfilament cytoskeleton has been transiently disrupted divide symmetrically or with variable asymmetry and partition P granules to either P<sub>1</sub> or AB or to both cells (Hill and Strome, 1988, 1990). A group of maternal-effect embryonic lethal genes, the *par* genes, plays crucial roles in establishment of anterior-posterior asymmetries in the early embryo (for review see Kemphues and Strome, 1997). Generally mutations in these genes result in symmetric and misoriented divisions, and P-granule mis-segregation. Consistent with their essential roles in establishing polarity, they encode cortical proteins that are asymmetrically distributed (Etemad-Moghadam and Kemphues, 1995; Guo and Kemphues, 1995; Boyd et al., 1996). This localization is controlled, at least in part, by non-muscle myosin heavy chain, *nmy-2* (Guo and Kemphues, 1996) and a novel transmembrane protein *ooc-3* (Basham and Rose, 1999; Pichler et al., 2000). The nonmuscle myosin regulatory light chain gene, *mlc-4*, is also required for normal anterior-posterior polarity (Shelton et al., 1999).

The *mes-1* gene also functions in asymmetric embryonic divisions, but specifically in the divisions of P<sub>2</sub> and P<sub>3</sub>. First identified as a maternal-effect sterile mutant, *mes-1* embryos produced from homozygous mothers lack the primordial germ cells, Z2 and Z3, and as a result develop into sterile adults (Capowski et al., 1991; Strome et al., 1995). Lineage analysis showed that in *mes-1* mutant embryos, P<sub>4</sub>, the mother of Z2 and Z3, is transformed into a muscle precursor like its sister cell, D (Strome et al., 1995). Because of this transformation, mutant animals lack germ cells and contain extra muscle cells. Observation of mutant embryos by Nomarski analysis reveals that the transformation of P<sub>4</sub> results from a loss of asymmetry in the division of both P<sub>2</sub> and P<sub>3</sub> (Strome et al., 1995). Each of these cells generates daughters more equal in size than in wild type, and both daughters frequently inherit P granules. Mis-segregated P granules are maintained in both daughters and their descendants, resulting in young larvae with P granules present in body wall muscle cells. This contrasts with wild-type embryos, in which occasionally mis-segregated P granules disappear from somatic cells, indicating that only germline cells are able to maintain P granules. The persistence of P granules in somatic cells of *mes-1* mutants suggests that both daughters of P<sub>3</sub> still retain some germline character, even after differentiating into muscle.

Analysis of fluorescently labelled P granules in living embryos has provided insights into cell-specific events in P<sub>2</sub> and P<sub>3</sub>, and into the role of MES-1 in these events (Hird et al., 1996). The movement of the nucleus-centrosome complex and the segregation of P granules show a distinctive pattern in P<sub>2</sub> and P<sub>3</sub>, which differs from the pattern in P<sub>0</sub> and P<sub>1</sub>. In wild-type P<sub>0</sub> and P<sub>1</sub> cells, the centrosomes duplicate, separate, rotate 90° while attached to the nuclear envelope, and then form the mitotic spindle. This results in alignment of the spindle along the anterior-posterior axis in both cells. Concurrently but independent of the spindle and even of microtubules, P granules become partitioned to the posterior of the cell (Strome and Wood, 1983). In P<sub>2</sub> and P<sub>3</sub>, P-granule segregation depends, at least in part, on the movement of the nucleus-centrosome complex (Fig. 1). P granules associate, in a perinuclear manner, with the nucleus-centrosome complex, and also disappear from

the cytoplasm destined for the somatic daughter cell. It is unknown if this disappearance is due to degradation or disassembly of the granules. The nucleus-centrosome complex rotates and migrates to the ventral side of the P cell, and then forms the spindle. When the nuclear membrane breaks down, the associated P granules are released. Thus, in P<sub>2</sub> and P<sub>3</sub>, rotation and migration of the nucleus-centrosome complex accomplishes three results: orientation of the spindle along the dorsal-ventral axis, asymmetric positioning of the spindle closer to the ventral pole and delivery of the majority of P granules to the ventral cytoplasm. These events ensure that P granules are delivered to the small, ventral (germline) daughter cell. These events in P<sub>2</sub> and P<sub>3</sub> are altered and uncoordinated in *mes-1* mutant animals. The nucleus-centrosome complex does not migrate and P granules become segregated to one side instead of one pole of the spindle, resulting in their distribution to both daughter cells (Fig. 1). It is postulated that, in addition to P granules, other factors, such as muscle determinants, are also mislocalized; the presence of muscle determinants in both P<sub>4</sub> and D causes both daughters to produce muscle.

Here, we present molecular characterization of *mes-1* and show that it encodes a transmembrane protein with similarity to receptor tyrosine kinases, though it is unlikely to have kinase activity. We also show that MES-1 is localized to a restricted portion of the cell membrane in the P cells of four- to 24-cell embryos. This pattern, on the P-cell membrane adjacent to its gut-cell neighbor, correlates with the location at which the next P cell forms. Thus, MES-1 localization is consistent with its role in the asymmetric divisions that generate P<sub>3</sub> and P<sub>4</sub>. Analysis of its distribution in various cell-fate and patterning mutants suggests that the localization of MES-1 is not dependent on the correct fate of either the P cells or the gut cells, but is dependent upon correct spatial organization of the embryo.

## MATERIALS AND METHODS

### Strains and alleles

Maintenance and genetic manipulation of *C. elegans* were carried out as described in Brenner (1974). *C. elegans* variety Bristol, strain N2 was used as the wild-type strain. The following mutations, polymorphisms, balancers and deficiencies were used in this study. LGI: *glp-4(bn2ts)*, *unc-13(e1091)*, *mom-4(or39)*, *hT1(I,V)*, *pop-1(zu189)*, *dpy-5(e61)*, *hT2[bli-4(e937) let-?(h661)]* (I,III), *unc-101(m1)*, *par-6(zu222)*, *hTn1[unc-54(h1040)]*. LGII: *rol-1(e91)*, *mex-1(zu121)*, *mnC1[dpy-10(e128) unc-52(e444)]*. LGIII: *hT2[bli-4(e937) let-?(h661)]* (I,III), *pie-1(zu154)*, *unc-25(e156)*, *dpy-19(e1259)*, *glp-1(q339)*, *par-2(lw32)*, *unc-45(e286ts)*, *sC1[dpy-1(e1) let-?]*, *lon-1(e185)*, *par-3(it71)*, *qC1[dpy-19(e1259ts) glp-1(q339)]*. LGIV: *hT1* (I,V), *rol-4(sc8)*, *par-1(b274)*, *nT1(IV,V)*, *DnT1[unc(n754)let]* (IV,V), *unc-5(e152)*, *unc-22(s7)*, *let-99(s1201)*, *unc-31(e169)*. LGV: *dpy-11(e1180)*, *mom-2(or42)*, *nT1(IV,V)*, *him-5(e1490)*, *DnT1[unc(n754)let]* (IV,V), *par-4(it75ts)*. LGX: *mes-1(bn74ts)*, *mes-1(bn7ts)*, *mom-4*, *mom-2*, *let-99*, *pop-1* and *pie-1* strains were from the *Caenorhabditis* Genetics Center. Strains containing *par* mutations were a gift from K. Kemphues; *mex-1* was a gift from G. Seydoux; and *pos-1* was a gift from J. Priess.

### Cloning *mes-1*

*mes-1* was mapped to cosmid C38D5, as described in Browning et al. (1996). Restriction fragments of C38D5 were cloned into pBS-Bluescript (Stratagene) using standard methods. Cosmid DNA and

plasmids carrying cosmid fragments were prepared by standard alkaline lysis method (Sambrook et al., 1989) followed by RNase treatment and proteinase treatment. Each DNA (1–10 mg/ml) was coinjected with pRF4 (100 µg/ml), a plasmid carrying the dominant marker, *rol-6(su1006)*, into the gonad arms of *mes-1(bn7)* homozygous hermaphrodites, using the procedure of Mello et al. (1991). Heritable lines of Rol transformants were obtained and examined for rescue of the Mes-1 phenotype. C38D5 and a 17-kb *XhoI/NotI* fragment of it rescued. A plasmid carrying this fragment was labelled with [ $\alpha$ -<sup>32</sup>P] dCTP using Boehringer Mannheim's Random Primed Labelling Kit and used as a probe to screen a  $\lambda$ ZAP mixed-stage *C. elegans* cDNA library (Barstead and Waterston, 1989). Thirty-two cDNAs were detected and found to correspond to eight different genes. Four of the cDNA groups crossreacted to C38D5 by virtue of repetitive sequences and did not actually map to the genomic region covered by C38D5. Antisense or sense RNA to the remaining cDNA groups was prepared essentially as described by Guo and Kemphues (1995), except that the MEGAscript In Vitro Transcription Kit by Ambion was used. The RNA (approx. 1 mg/ml) was injected into the gonad arms of wild-type hermaphrodites, and the progeny of injected worms were examined for sterility. RNA from one of the four cDNA groups resulted in a Mes-1 phenocopy.

### Sequence analysis and 5' end isolation

cDNAs were initially sequenced using Sanger dideoxy-mediated chain termination (Sambrook et al., 1989). Additional sequencing was performed as described in Holdeman et al. (1998). The 5' end was isolated by RT-PCR. First-strand cDNA synthesis used an oligonucleotide primer that corresponded to the 5' end of the longest isolated partial cDNA. PCR on first-strand RT reaction products used a 5' oligonucleotide that corresponded to the predicted 5' end and an internal 3' primer. The DNA fragment was cloned into pBS-Bluescript (Stratagene) and sequenced. The 5' end was confirmed by repeating the PCR using an oligonucleotide that hybridized to spliced-leader (SL1) sequence for the 5' primer (Spieth et al., 1993).

For sequencing the *mes-1* alleles, genomic DNA was prepared from homozygous mutant worms carrying each of the eight mutant alleles. The *mes-1* gene was amplified using PCR as five segments that covered the entire coding region, some introns and all intron-exon boundaries. Each segment was cycle sequenced using ABI Prism Big Dye Cycle Sequencing (PE Applied Biosystems).

### Northern analysis

Northern hybridization analysis was performed as described in Holdeman et al. (1998), using the *rpp-1* transcript, which encodes a ribosomal protein, as a loading control (Evans et al., 1997). The intensity of the transcript bands was determined either from a scanned autoradiograph using NIH Image software or using a Molecular Dynamics PhosphorImager. The relative levels were expressed as a ratio of the *mes-1* signal intensity to the intensity of the *rpp-1* signal.

### Antibody production

A bacterial 6×His fusion expression construct was made by cloning a 1418 base pair fragment, corresponding to intracellular amino acids 495–966, into the *SacI* and *HindIII* sites of the pET-28a vector (Novagen). This fragment was generated by PCR of the original cDNA isolate using oligonucleotides containing a *SacI* site (5' primer) and a *HindIII* site (3' primer). The fusion protein was expressed in *E. coli* strain BL21(DE3) and purified using Ni-NTA agarose columns (Qiagen). The purified protein, isolated in a polyacrylamide gel slice, was injected into rats with Freund's adjuvant. Anti-MES-1 antibodies were purified from crude antiserum by blot affinity purification and elution by 0.2 M glycine, pH 2.8 (Olmsted, 1986). Following dialysis against PBS, the antibodies were passed over a column of 6×His-MES-6 (Korf et al., 1998) attached to AFFI-GEL active ester agarose 10 (Biorad) to remove nonspecific and denatured antibody. Anti-MES-1 antibodies were not able to detect MES-1 on a western blot

from total embryo extract, but were able to detect MES-1 if immunoprecipitation was performed first.

### Immunofluorescence analysis

To visualize MES-1 localization, animals were cut in a drop of M9 and fixed in cold methanol followed by cold acetone as described in Strome and Wood (1983). Samples were blocked in PBS, 1.5% bovine serum albumin, 1.5% non-fat dried milk prior to applying a 1:3 dilution of affinity-purified anti-MES-1 antibodies. Crude rabbit anti-PGL-1 antiserum (Kawasaki et al., 1998) diluted 1:30,000, rabbit anti-penta-acetyl-histone H4 (kindly provided by D. Allis; Lin et al., 1989) diluted 1:6000, and rabbit anti-actin (against C-terminal peptide, Sigma) diluted 1:250, were also used. Serum from one animal used to produce anti-MES-1 antibodies contains anti-centrosome antibodies as well as anti-MES-1 antibodies. The centrosomal staining is unrelated to MES-1, since it is still detectable in *bn74* worms (a complete deletion allele of *mes-1*). Secondary antibodies used were affinity-purified fluorescein-conjugated goat anti-rat, rhodamine-conjugated goat anti-rabbit, Cy5-conjugated goat anti-rabbit (Jackson) or Alexa 488 goat anti-rat (Molecular Probes), diluted 1:250. Samples were mounted in Vectashield anti-fade mounting media (Vector Laboratories). In one series of staining, ethidium bromide was included in the mounting medium to detect DNA.

### Blastomere isolation

Blastomeres were isolated as described by Shelton et al. (1996), with modifications suggested by A. Skop (personal communication). Briefly, wild-type worms were cut in a drop of M9. The eggshell of young embryos (one-, two- and four-cell stages) was removed with hypochlorite (5–6% stock solution, diluted 1:6) treatment. Embryos were washed in egg salt buffer and the eggshell was further digested away in 5 U/ml chitinase, 20 mg/ml chymotrypsin in egg salt buffer for 7 minutes. Embryos were washed in three droplets of simplified growth medium (SGM) supplemented with 35% heat-treated calf serum. The vitelline membrane was removed by pipetting the embryos repeatedly through a narrow-bore drawn glass capillary. Cells were washed in serum-free SGM and fixed in 2% paraformaldehyde. The cells were then affixed to GCP-coated slides (0.2% gelatin, 0.002% chrome alum, 1 mg/ml polylysine) and stained with antibodies as described in the above section.

## RESULTS

### MES-1 is partially similar to receptor tyrosine kinases

To investigate how MES-1 participates in the asymmetric divisions of P<sub>2</sub> and P<sub>3</sub>, we analyzed the gene. The *mes-1* gene is located in the *egl-15-sma-5* interval on LGX. Because there were few useful genetic markers for recombination mapping in this interval, macrorestriction analysis was used to search for allele-associated restriction fragment length polymorphisms (RFLPs) (Browning et al., 1996). This analysis used infrequently cutting restriction enzymes and pulsed-field gel electrophoresis to examine large fragments of DNA. DNA from two alleles of *mes-1* showed an RFLP that mapped to cosmid C38D5 (Browning et al., 1996; data not shown). In DNA transformation rescue tests, the Mes-1 phenotype was rescued by the C38D5 cosmid, as well as by a 17 kb fragment of C38D5. This fragment was used to screen a cDNA library (Barstead and Waterston, 1989), and four different cDNAs that mapped to C38D5 were identified. It has been found that RNA prepared from cloned genes, when injected into wild-type hermaphrodites, produces a gene-specific phenocopy (Guo and



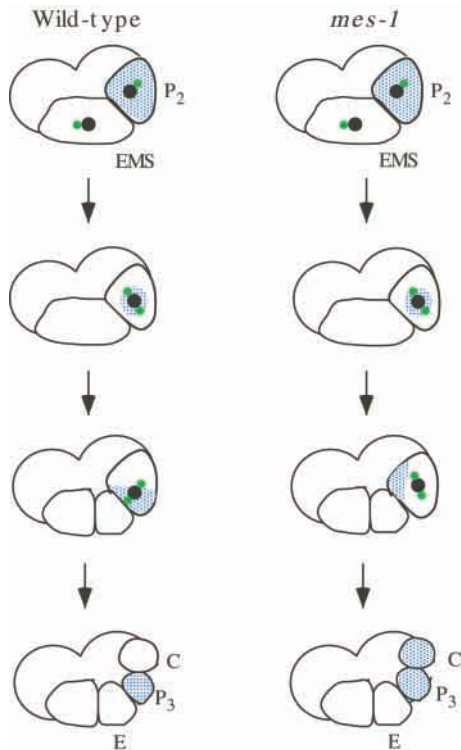

**Fig. 1.** Division and P-granule partitioning in P<sub>2</sub> in wild-type and *mes-1* four-cell embryos. Nuclei are shown in black, centrosomes in green and P granules in blue. Anterior is towards the left and ventral is downwards. In wild-type embryos, the majority of P granules associate perinuclearly and the nucleus-centrosome complex rotates and migrates to the ventral side of P<sub>2</sub>, where P granules are deposited and the spindle forms. In *mes-1* embryos P granules associate perinuclearly, but the nucleus-centrosome complex does not rotate and migrate. This results in a symmetrically placed spindle, which generally comes to lie along the correct axis. P granules are usually segregated to one side of the spindle and distributed to both daughters.

Kemphues, 1995; Rocheleau et al., 1997; Fire et al., 1998). This phenomenon, termed RNA interference (RNAi), was used to determine which of the four cDNAs from C38D5 corresponded to *mes-1*. Injection of RNA from one cDNA phenocopied the *Mes-1* defects. This cDNA was confirmed as *mes-1* by failure to detect a transcript in northern analysis of mRNA from a deletion allele of *mes-1* and by sequencing mutant alleles (see below).

The nucleotide sequence of the *mes-1* cDNA (Accession number AF200199, listed in GenBank under reference cosmid F54F7, Accession number Z67755, which extensively overlaps with cosmid C38D5) predicts that *mes-1* encodes a protein of 966 amino acids (Fig. 2A) that shows overall structural similarity to receptor tyrosine kinases (RTKs; for review, see Hanks and Quinn, 1991; Van Der Greer et al., 1994). RTKs are a very large, well conserved family of proteins that are involved in signaling pathways for cell growth and differentiation. Consistent with it belonging in this class of proteins, MES-1 contains a signal sequence, a single transmembrane domain, and an intracellular kinase-like domain. The extracellular region of MES-1 contains seven potential glycosylation sites

(consensus NXS/T where X is any amino acid except P and D) but no recognizable domains or motifs. The kinase region of RTKs consists of 11 subdomains, called I-XI, that have the following functions: I-III bind the phosphate donor Mg<sup>2+</sup>/ATP; IV is structural; V-VII are catalytic; VIII-IX provide substrate recognition; X and XI are undefined. The predicted MES-1 protein lacks any significant sequence similarity to subdomains I and II, and its subdomains III-XI show only 20-25% identity with other RTKs, compared with >35% identity for typical kinases. Furthermore, even within these subdomains, several amino acids required for catalytic activity are absent from MES-1 (Fig. 2A). Specifically, MES-1 has changes in 10 of the 21 invariant and nearly invariant amino acids that are found in almost all kinases, including serine/threonine kinases (Hanks and Quinn, 1991). The lack of a recognizable nucleotide binding site and the above described sequence differences within the kinase region suggest that MES-1 is not a functional kinase.

### *mes-1* alleles

Two alleles of *mes-1* contain substantial alterations of the gene. *bn74* has a 25 kb deletion that removes the entire coding region of *mes-1* (Browning et al., 1996). *bn89* is a more complex rearrangement consisting of both a deletion and a duplication: a 5.5 kb deletion removes the upstream region and 0.5-1 kb of coding sequence and a approx. 3 kb duplication contains much of the coding sequence. As expected, neither of these *mes-1* alleles produces mRNA or protein (Figs 3A, 4D and data not shown).

The other eight alleles of *mes-1* produce mRNA and were sequenced to determine their molecular lesions (Fig. 2B). The entire coding region and all intron-exon boundaries were sequenced. For one allele, *bn7*, no changes were found. Three alleles, *bn24*, *bn90* and *bn84*, contain base pair changes that result in a premature stop codon. Allele *bn56* contains a change in a 3' splice site. Two alleles, *q367* and *q222*, contain missense amino acid changes. Allele *bn52* contains two mutations: a 50 bp deletion within intron 1 and a missense change of Gly<sub>890</sub> to Glu in subdomain IX (Fig. 2B). RTKs have an invariant serine at that position. Only allele *bn52* produces detectable embryo staining (data not shown). The distribution of MES-1 in *bn52* is the same as in wild type, but the protein does not persist as long. Interestingly, all ten *mes-1* alleles result in equally severe phenotypes.

### *mes-1* transcript is enriched in adults and embryos

The *mes-1* gene produces a 3.7 kb transcript, which is first detected at the L4 stage, accumulates in adults, and is present in embryos (Fig. 3B). To investigate if the *mes-1* transcript is germline specific, northern analysis was performed using RNA from *glp-4(bn2)* worms, which essentially lack germ cells (Beanan and Strome, 1992). The *mes-1* transcript level in adult *glp-4(bn2)* worms is 20-30% of the wild-type adult level (data not shown). The enrichment of *mes-1* in the germline of worms and its presence in embryos are consistent with the known function of *mes-1* in early embryos. The presence of significant levels of *mes-1* RNA in somatic cells (i.e. in *glp-4* worms) was unexpected since *mes-1* mutants display a strictly maternal-effect sterile phenotype. No specific pattern of MES-1 staining was detected in somatic tissues when wild-type animals were compared with *bn74* animals.

**Fig. 2.** MES-1 protein sequence and allele mutations. (A) Predicted MES-1 amino acid sequence. Potential glycosylation sites are marked with asterisks (consensus NXS/T) and the transmembrane domain is underlined. Roman numerals show the approximate locations of kinase subdomains described in the text. Amino acids that are invariant or nearly invariant in RTKs are boxed. Blue boxes indicate the residue is conserved in MES-1 and red boxes indicate the residue is not conserved. (B) Schematic drawing of MES-1 showing the relative positions and amino acid changes for seven of the eight non-deletion alleles of *mes-1*. The shaded boxes represent the transmembrane and the kinase-like domains.

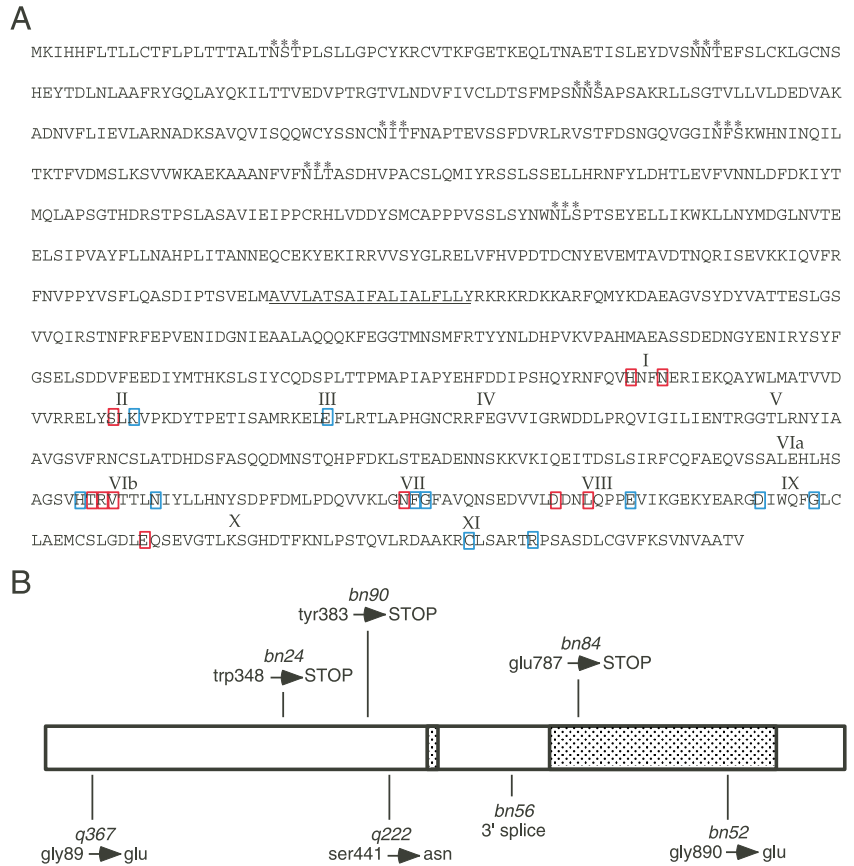

### MES-1 is localized in four- to 24-cell embryos at the junction between the germline cell and the gut cell

To address when and where MES-1 protein functions, its subcellular localization was determined by immunofluorescence microscopy. Rat antisera were raised against a 6×His-tagged fusion protein containing the 475 amino acid intracellular domain of MES-1 and were then affinity purified. The specificity of the antibody was confirmed by the fact that MES-1 staining was undetectable in worms homozygous for a deletion allele of *mes-1*, which removes the entire gene (allele *bn74*; Fig. 4D). MES-1 is detected as a thin crescent, initially in four-cell embryos between P<sub>2</sub> and EMS and then in eight- to 12-cell embryos between P<sub>3</sub> and E (Fig. 4A,B). The EMS blastomere gives rise to E, which produces gut (intestine), and MS, which produces pharynx and muscle (Deppe et al., 1978; Sulston et al., 1983). In this paper we refer to EMS as a gut cell, though it generates more than just gut. MES-1 persists through the formation of P<sub>4</sub> at the 24-cell stage (Fig. 4C). After P<sub>4</sub> is generated, MES-1 begins to fade and is usually not detectable beyond the 30-40-cell stage (data not shown).

MES-1 is predicted to span the membrane. To confirm that MES-1 was located at the cell periphery, embryos were stained with an antibody to actin, which is concentrated in the cell cortex (Fig. 5A-E). Where MES-1 staining was present, it was adjacent to and sometimes overlapped with actin staining. The crescent shape of MES-1 staining outlined a portion of the contact area between the germline and the gut cell; the tips of the crescent point dorsally, towards the interior of the embryo.

MES-1 localization appears to correlate with the position to which the nucleus-centrosome complex migrates (Hird et al., 1996). To determine the relative positions of MES-1 and the spindle, embryos were stained with antibodies that detect

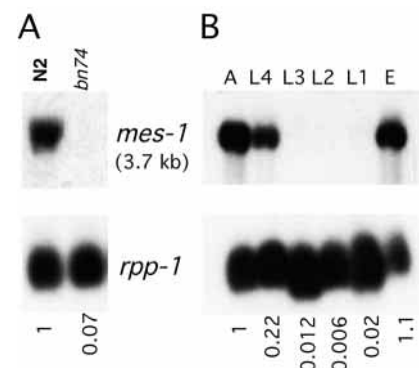

**Fig. 3.** Northern analysis of *mes-1* transcripts. (A) *mes-1* mRNA is detectable in wild type (N2) and undetectable in the *mes-1* deletion allele *bn74*. (B) *mes-1* mRNA accumulation during development. PolyA<sup>+</sup> RNA was isolated from wild-type hermaphrodites, which were synchronized at each of the six developmental stages shown. A, adults; E, embryos; L1-L4, four larval stages. In (A) and (B) a 2.6 kb partial cDNA clone of *mes-1* was used as a probe to detect the 3.7 kb transcript. The transcript of the ribosomal gene, *rpp-1*, was used as a loading control. Relative levels of the *mes-1* transcript are shown at the bottom.

centrosomes (Fig. 6A-B). From late prophase through anaphase, the more ventral centrosome was closely juxtaposed to the MES-1 crescent, with the two appearing to almost touch (Fig. 6A). By telophase, MES-1 and the centrosome had separated (Fig. 6B).

The pattern of MES-1 staining is consistent with its function in the asymmetric divisions of P<sub>2</sub> and P<sub>3</sub>. The stages that exhibit MES-1 localization temporally correlate with the P<sub>2</sub>/P<sub>3</sub>-specific role for MES-1. The loss of MES-1 after the formation of P<sub>4</sub> reinforces the idea that MES-1 is only needed until this cell is formed. Its localization between the P cell and the gut cell also spatially correlates with where the future P cell will form (Hird et al., 1996).

### MES-1 is localized in the germline cell starting with P<sub>2</sub>

As a consequence of the localization of MES-1 to the area of contact between P<sub>2</sub> and EMS and between P<sub>3</sub> and E, it was not apparent from examining intact embryos whether the P cell or the gut cell or both contained protein. To address this issue, the P<sub>2</sub> cell was dissociated from four-cell embryos and both it and the remaining embryo portion were fixed and stained for MES-1 (Fig. 7). MES-1 was detected on the surface of P<sub>2</sub> and not on any other cells of the remaining embryo, most notably not on the EMS cell. Within the isolated P<sub>2</sub> cell, the distribution of MES-1 was still in a crescent shape. Given the restriction of MES-1 to the P<sub>2</sub> cell

at the four-cell stage, it is reasonable to assume that in later-stage embryos MES-1 is present on the surface of P<sub>3</sub> and P<sub>4</sub>, although this was not tested by staining isolated P<sub>3</sub> and P<sub>4</sub> cells. Consistent with this assumption, co-staining of MES-1 and actin (see Fig. 5) shows the cytoplasmic domain of MES-1 to be on the P-cell side of the zone of germline-gut contact. These immunostaining patterns suggest that MES-1 functions cell autonomously within the P cell.

### Effects of cell fate and polarity defects on MES-1 localization

The distinct localization of MES-1, on P<sub>2</sub> and P<sub>3</sub> at the border with the gut cell, raised several questions, which were addressed by staining various early embryonic mutants for MES-1.

First, is the germline fate of the P cells required for MES-1 expression and localization? In *pie-1* mutants P<sub>2</sub> develops like its somatic sister, EMS (Mello et al., 1992). PIE-1 represses transcription of somatically expressed genes in the P cells, and the loss of this repression in *pie-1* mutants causes the fate transformation of P<sub>2</sub> (Seydoux et al., 1996). MES-1 localization appeared wild-type in *pie-1* mutant embryos (data not shown). This suggests that P<sub>2</sub> can lose at least one germline trait (transcriptional repression) and need not manifest a germline fate to properly express and localize MES-1.

Second, is the gut fate of EMS required for correct MES-1

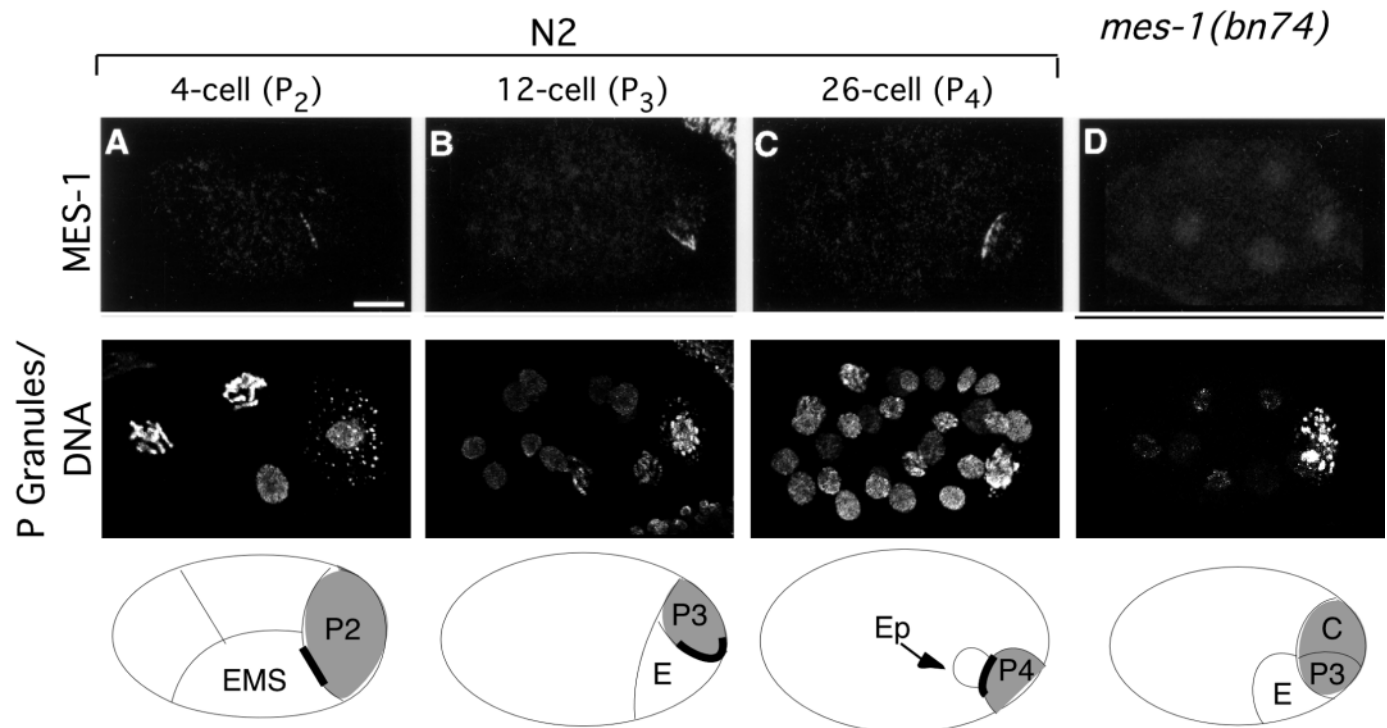

**Fig. 4.** MES-1 localization in wild-type and *mes-1* mutant embryos. Projections of multiple confocal optical sections. Anterior is towards the left and ventral is downwards. Top row stained with anti-MES-1 antibodies. Middle row stained with anti-PGL-1 and anti-acetyl-histone H4, which detect P granules and DNA, respectively. Bottom row shows schematic drawings of the embryos, with the germline and the gut cells indicated. Cells containing P granules are shaded gray, and the MES-1 crescent is shown as a thick black line. Delineation of the cells is only approximate and is based on the positions of the nuclei. Wild-type (N2) embryos at the four-cell stage (A), 12-cell stage (B) and 26-cell stage (C). MES-1 is localized as a crescent between the germline and the gut cells, specifically between P<sub>2</sub> and EMS (A), P<sub>3</sub> and E (B), and P<sub>4</sub> and Ep (C). (D) *bn74*, a complete deletion of the *mes-1* gene, lacks detectable MES-1 staining; eight-cell stage embryo shown. Scale bar: 10  $\mu$ m.

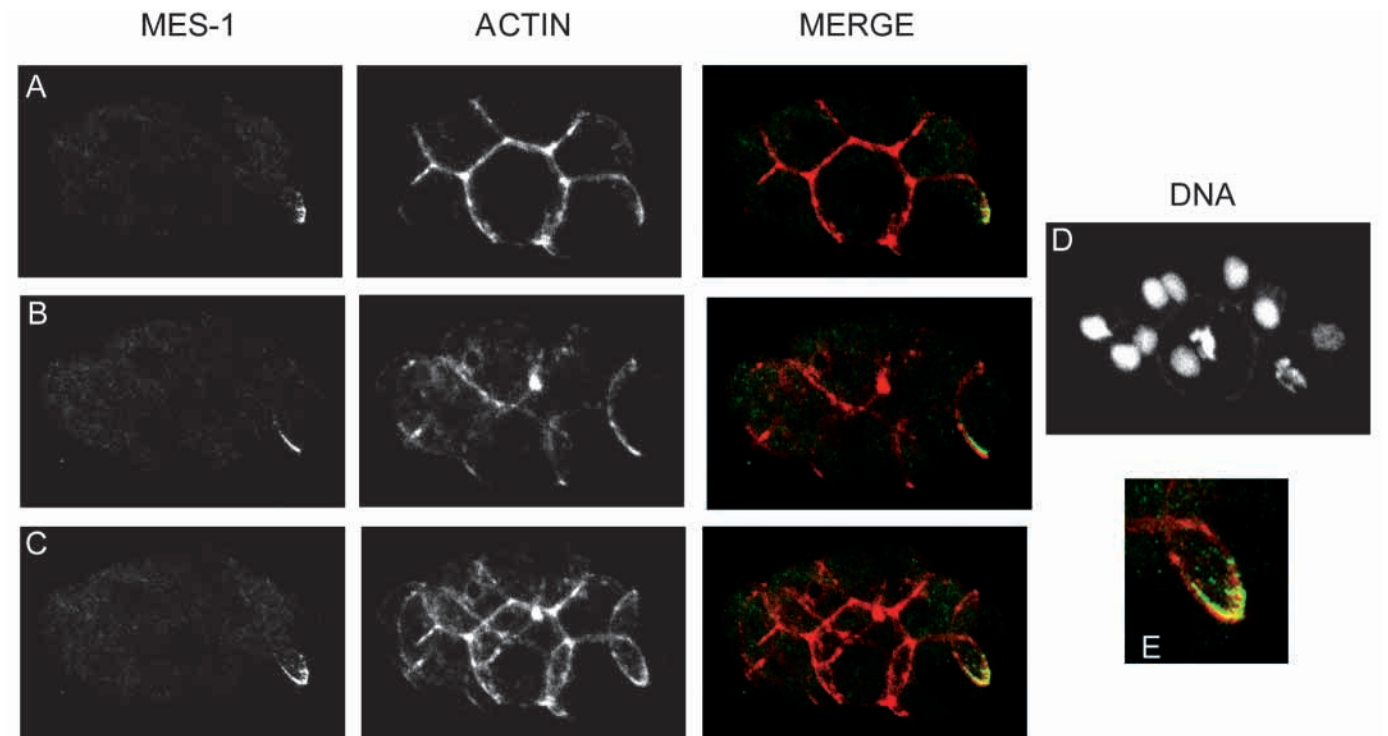

**Fig. 5.** MES-1 and actin localization in a wild-type 15-cell embryo. Projections of multiple confocal optical sections. Anterior is leftwards and ventral is downwards. Left column is anti-MES-1 staining. Middle column is anti-actin staining. Right column contains merged images. Red shows actin, green shows MES-1. MES-1 is localized at the cell periphery. (A) Projection of upper sections showing half the crescent. (B) Projection of lower sections showing the other half of the crescent. (C) Projections of all confocal sections. These sections show that one half of the crescent is on the left side of the embryo, and the other on the right, and that the tips of the crescent are pointed dorsally. (D) DNA stained with ethidium bromide. (E) Enlargement of the merged MES-1 crescent and actin.

patterning? In *pop-1* embryos, EMS produces two E cells instead of an E and an MS cell (Lin et al., 1995). In *mom-2* and *mom-4* embryos, EMS produces two MS cells (Thorpe et al., 1997; Rocheleau et al., 1997). MES-1 localization appeared to be the same as in wild type in these mutant

embryos (data not shown), suggesting that proper MES-1 localization is not dependent on the correct specification or fate of the EMS lineage.

Last, do factors that regulate establishment of polarity and unequal divisions in one- and two-cell embryos affect the

#### MES-1/Centrosomes

#### DNA

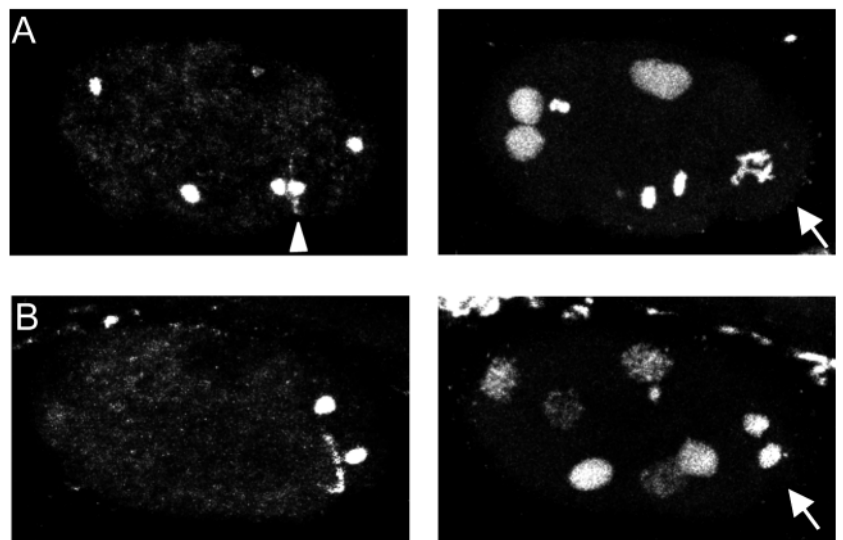

**Fig. 6.** MES-1 and centrosome localization in wild-type six- to seven-cell embryos. Left panels show staining with antibodies to MES-1 and centrosomes. Right panels show staining of DNA with ethidium bromide. Projections of multiple confocal optical sections. Anterior is leftwards and ventral is downwards. Arrows point to P<sub>2</sub> cell in (A) prometaphase and (B) telophase of mitosis. Arrowhead in (A) points to MES-1 crescent 'sandwiched' between posterior centrosome of EMS (left of MES-1) and ventral centrosome of P<sub>2</sub> (right of MES-1).



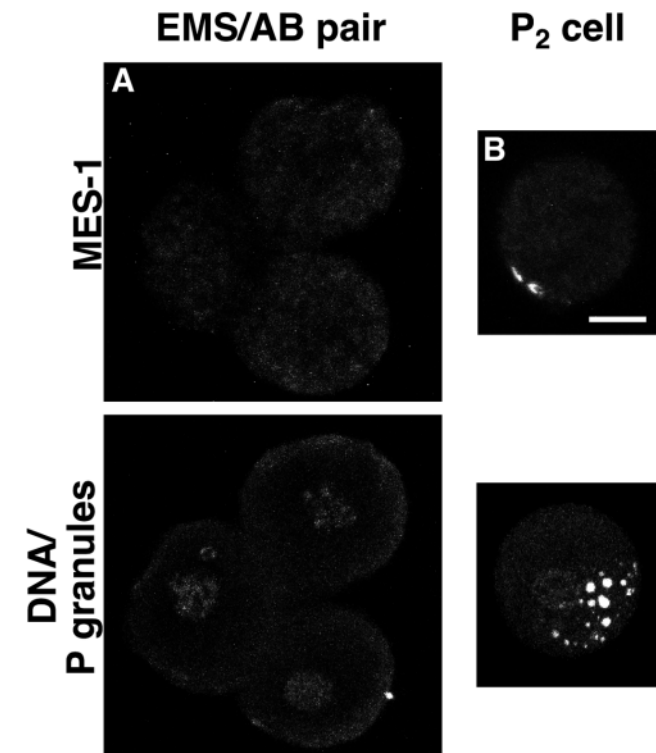

**Fig. 7.** MES-1 localization in isolated blastomeres. Projections of multiple confocal optical sections of an isolated germline blastomere and a partial embryo missing the germline blastomere. Top panels stained with anti-MES-1 antibodies. Bottom panels stained with anti-PGL-1 and anti-acetyl-histone H4, which detect P granules and DNA, respectively. (A) Remaining cells, ABa, ABp and EMS, of a four-cell embryo after removal of P<sub>2</sub> (*n*=5). (B) Isolated P<sub>2</sub> from a four-cell embryo. This demonstrates the presence of MES-1 on P<sub>2</sub> (*n*=6). In intact embryos P granules are located close to, but not centered over, the MES-1 crescent, so in the isolated P<sub>2</sub> blastomere P-granule localization appears relatively normal. Scale bar: 10  $\mu$ m.

distribution of MES-1 in four-cell and later stages? Mutants used in this analysis exhibited MES-1 staining patterns that fell into two general categories.

The first category is a lack of detectable MES-1. This pattern

was seen in mutant embryos from *par-1*, *par-3* and *par-4* animals. *par-1* embryos undergo a symmetric first division and distribute P granules to both daughter cells (Kemphues et al., 1988). *par-4* embryos show fairly normal first division asymmetry, but like *par-1* distribute P granules to both daughter cells. *par-3* embryos undergo a symmetric first division and sometimes distribute P granules to both daughters. MES-1 was not detectable in embryos from any of these *par* mutants (Fig. 8A and data not shown).

The second category displays a variety of MES-1 staining patterns which include ‘wild-type’, ‘ectopic’ and absent. Classification of the type of MES-1 staining was based on the following criteria: ‘wild-type’ – the MES-1 crescent was asymmetrically distributed on one side of a posteriorly located cell that contained P granules, but the embryo itself did not always appear to be the same as wild type; ‘ectopic’ – a MES-1 crescent was present on more than one face of a single cell or on more than one cell or on a cell that was not at the posterior end of the embryo. Mutants that produce a variable MES-1 pattern are *pos-1*, *par-2*, *par-6*, *let-99* and *mex-1* (Table 1 and Fig. 8B-E). *pos-1* embryos display several defects, including symmetric division of P<sub>2</sub> and P<sub>3</sub> and distribution of P granules to both daughters of P<sub>3</sub> (Tabara et al., 1999), which we speculate may result from an absence or altered distribution of MES-1. *par-2* embryos correctly segregate P granules in the first division, but show an altered P<sub>1</sub> division pattern and distribute P granules to both daughters of P<sub>1</sub> (Kemphues et al., 1988; Boyd et al., 1996). Most *par-6* embryos correctly segregate P granules in the first division, but in the four-cell stage, P granules are detected in all four blastomeres (Watts et al., 1996). In *let-99* embryos spindles are not properly oriented, but nevertheless P granules are segregated properly in the first two divisions (Rose and Kemphues, 1998). In *mex-1* embryos all founder lineages, including the germline, display cell-fate defects, suggesting that MEX-1 plays a role in general polarity of the embryo (Schnabel et al., 1996). *mex-1* embryos often correctly segregate P granules during the division of P<sub>0</sub> but then mis-segregate them in subsequent divisions (Mello et al., 1992). As stated above, all of these mutants display a variable, and often aberrant, distribution of MES-1 (Table 1). Together, these results indicate that MES-1 distribution depends, either directly or indirectly, on polarity cues established earlier in the embryo.

**Table 1. Percentage of mutant embryos displaying aberrant MES-1 localization**

| Mutant strain                       | Type of aberrant MES staining <sup>b</sup> | Cell stage of embryo <sup>a</sup> |    |     |    |       |       |       |
|-------------------------------------|--------------------------------------------|-----------------------------------|----|-----|----|-------|-------|-------|
|                                     |                                            | 2-3                               | 4  | 6-7 | 8  | 10-14 | 15-20 | 21-28 |
| <i>pos-1</i> ( <i>zu148</i> )       | Ect                                        | 10 <sup>c</sup>                   | 0  | 0   | 20 | 79    | 87    | 75    |
| <i>mex-1</i> ( <i>zu121</i> ): 16°C | Ect                                        | 20 <sup>c</sup>                   | 20 | 11  | 25 | 74    | 89    | 71    |
| <i>mex-1</i> ( <i>zu121</i> ): 25°C | Ect                                        | 0                                 | 0  | 7   | 53 | 41    | 48    | 36    |
| <i>par-2</i> ( <i>lw32</i> )        | Ect                                        | 0                                 | 12 | 17  | 32 | 31    | 24    | 22    |
|                                     | Abs                                        |                                   | 65 | 17  | 44 | 56    | 52    | 58    |
| <i>let-99</i> ( <i>s1201</i> )      | Ect                                        | 0                                 | 7  | 0   | 15 | 48    | 42    | 22    |
|                                     | Abs                                        |                                   | 7  | 0   | 0  | 9     | 11    | 17    |
| <i>par-6</i> ( <i>zu222</i> )       | Ect                                        | 0                                 | 50 | 50  | 78 | 71    | 74    | 50    |
|                                     | Abs                                        |                                   | 11 | 0   | 0  | 7     | 7     | 33    |

<sup>a</sup>For each stage a minimum of twenty embryos were counted.

<sup>b</sup>Ect - ectopic MES-1 pattern

Abs - absent or undetectable MES-1

<sup>c</sup>Since MES-1 is not normally detected prior to the four-cell stage, the precocious staining is considered aberrant.



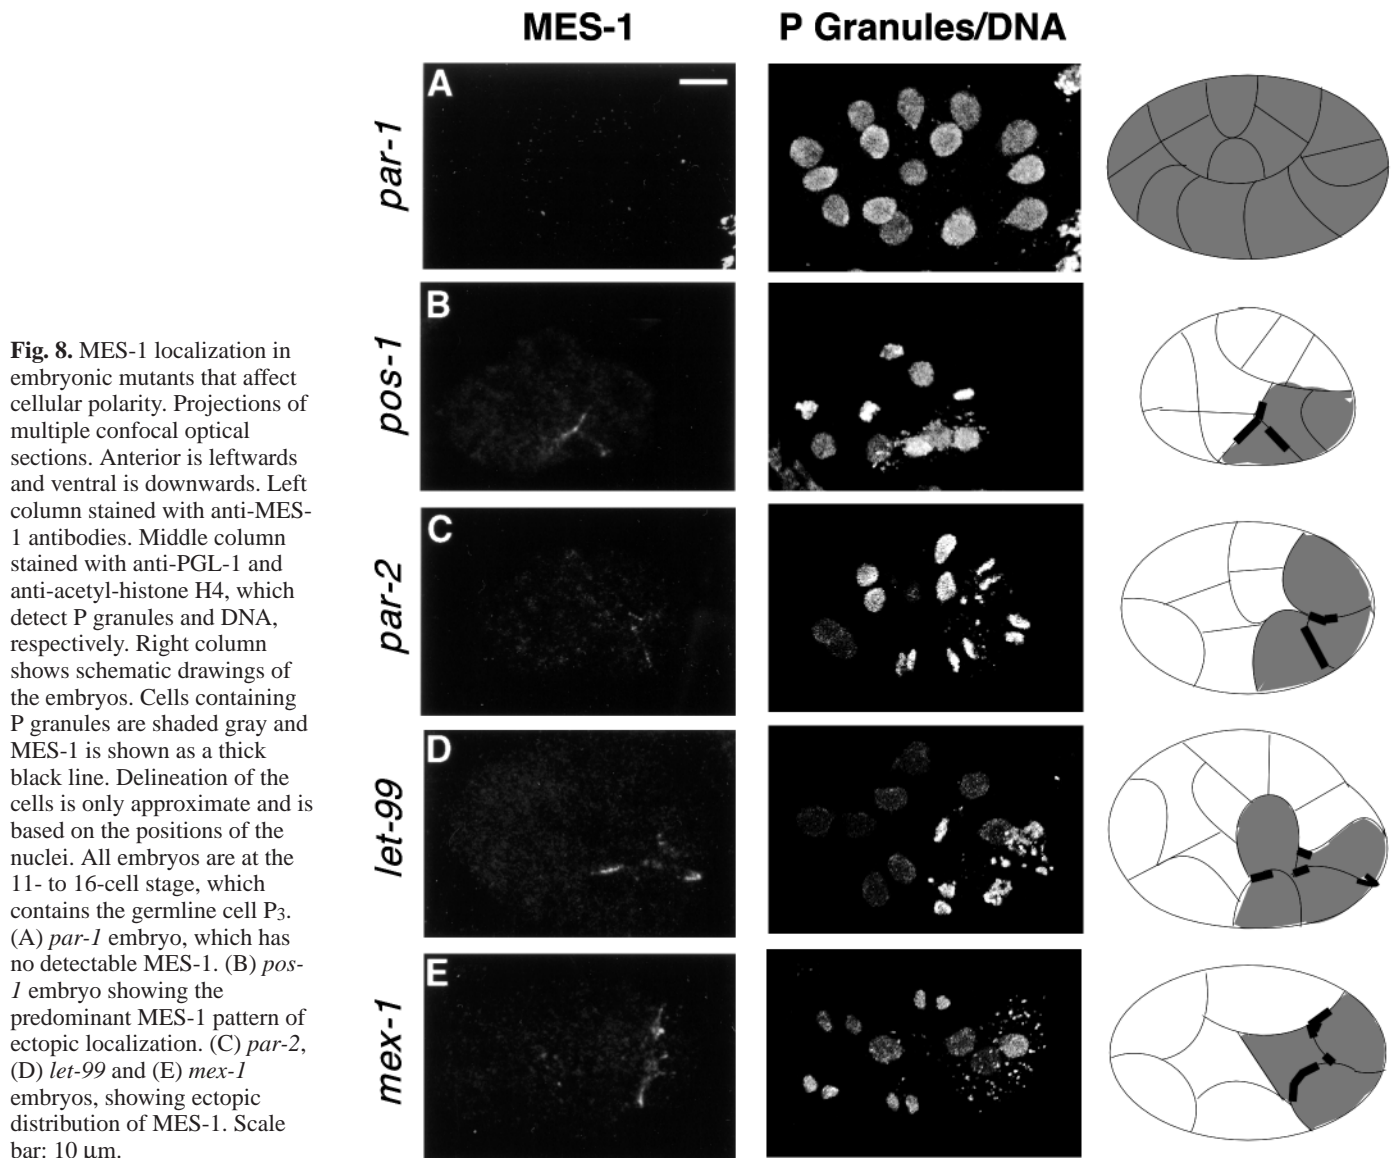

## DISCUSSION

MES-1 is a predicted transmembrane protein that shows overall structural similarity to receptor tyrosine kinases, although it is unlikely to have kinase activity. MES-1 is at the surface of P<sub>2</sub> and P<sub>3</sub>, which correlates both spatially and temporally with its role in the asymmetric divisions of these cells. Early embryonic mutants that alter embryonic polarity cause MES-1 to be ectopically localized or absent.

### Function of MES-1 in asymmetric germline divisions

Based on the defects in migration of the nucleus-centrosome complex in *mes-1* mutants and on the membrane localization of MES-1, we propose the following two models for how it may function. MES-1 may directly cause the movement of the nucleus-centrosome complex and its associated P granules in P<sub>2</sub> and P<sub>3</sub>. In this model, MES-1 probably interacts with microtubules emanating from the centrosomes; MES-1 may bind microtubules directly or via a microtubule-associated

protein or microtubule motor (for examples, see Thaler and Haimo, 1996; Stearns, 1997). MES-1, together with any associated proteins, pulls the nucleus-centrosome complex towards itself, resulting in proper alignment and asymmetric positioning of the spindle. The close physical proximity between the MES-1 crescent and one centrosome of the spindle seems to support this model. Alternatively, MES-1 could provide an orientation signal for events in P<sub>2</sub> and P<sub>3</sub>. Its location may mark an area of the cell and signal where the next P cell is to be generated. The nucleus-centrosome complex and P granules would then respond to this signal and migrate towards it. These two models are not necessarily mutually exclusive.

MES-1 also participates in orienting a gradient of activity that stabilizes or destabilizes P granules. As described earlier, P granules not only aggregate perinuclearly, but they also disappear from the portion of the cell destined for the somatic daughter. This behavior is probably due to a gradient of P-granule stabilizing and/or destabilizing activity. In *mes-1* mutant embryos, P granules disappear from the wrong region

of the cell (see Fig. 1). As a result, P granules come to lie along one side, instead of one pole, of the spindle and consequently are partitioned to both daughter cells. The role of MES-1 in positioning the P-granule gradient, but not in forming the gradient, is analogous to that of Inscuteable in *Drosophila* neuroblasts. The determinant Numb is asymmetrically localized as a crescent and placement of the crescent, but not its formation, is dependent on Inscuteable (Kraut et al., 1996).

In formulating models for MES-1 function, the temperature-sensitivity of the Mes-1 phenotype needs to be considered. All ten alleles of *mes-1*, including a deletion of the entire coding sequence, exhibit a large percentage (70-90%) of sterile progeny at high temperature and a low percentage (10-15%) at lower temperature (Capowski et al., 1991). Indeed, division asymmetry in P<sub>2</sub> and P<sub>3</sub> are usually normal in *mes-1* embryos at low temperature and altered at high temperature (Strome et al., 1995; E. Schierenberg and S. S., unpublished). This reveals that the process that controls unequal division and partitioning in P<sub>2</sub> and P<sub>3</sub> is inherently sensitive to temperature and does not absolutely require MES-1 at low temperature. Through an interaction or dimerization, MES-1 may stabilize a factor that is prone to inactivation at high temperature. Alternatively, there may be redundant pathways for achieving correct division of P<sub>2</sub> and P<sub>3</sub>, one controlled by MES-1 and a separate one that is prone to inactivation at high temperature.

### Possible mechanisms of MES-1 function

While MES-1 shows overall similarity to receptor tyrosine kinases, it lacks several subdomains and invariant amino acids that are required for kinase activity. Thus, it is probably not catalytically active. How then does MES-1 function?

MES-1 may acquire kinase activity through association with another kinase, either another RTK (e.g. Qian et al., 1992, 1994; Wada et al., 1990; Pinkas-Kramarski et al., 1996) or a non-receptor kinase. An associated kinase could either phosphorylate MES-1, creating docking sites (see below), or itself generate an intracellular signal to orient P<sub>2</sub> and P<sub>3</sub> events, as discussed above. An alternative scenario is that association of MES-1 with a kinase may instead have a dominant-negative effect and inhibit the activity of the kinase.

MES-1 may assemble into and function as part of a localized multi-component complex, similar to many kinases and phosphatases (Faux and Scott, 1996; Pawson and Scott, 1997). Indeed, MES-1 contains four potential binding sites for Src-homology-2 (SH2) domains. SH2 domains recognize phosphotyrosines in a short motif and mediate protein-protein interactions (Pawson, 1995). Budding in yeast provides a striking example of assembly and use of a localized complex to orient cell division. The bud site contains multiple proteins, including GTPases and Bni1, a scaffold protein that links the GTPases with the actin cytoskeleton (for review see Cabib et al., 1998; Lee et al., 1999). Localized reorganization of the actin cytoskeleton leads to reorientation of the mitotic spindle. A similar series of events may occur through MES-1 and an associated complex in P<sub>2</sub> and P<sub>3</sub>.

If MES-1 is a receptor, what is the nature and source of its ligand? The observation that MES-1 is seen only on the surface of P<sub>2</sub> and P<sub>3</sub> where they contact the gut cell suggests that the gut cell supplies the ligand and that the ligand may be membrane-associated itself. MES-1 and its ligand may interact through direct cell-cell contacts, in a manner analogous to that

of the Eph subfamily of RTKs and ephrin membrane-associated ligands (for review see Brüchner and Klein, 1998). Interaction with this hypothetical ligand may cause MES-1 to aggregate to only the portion of the P cell that contacts the gut cell, which may activate MES-1.

### Do EMS and E signal division asymmetry in P<sub>2</sub> and P<sub>3</sub>?

It has been thought that the asymmetric divisions of the germline cells occur cell autonomously. Isolated P<sub>2</sub> and P<sub>3</sub> cells did not reorient their spindles in response to contact with a gut blastomere, suggesting that germline-gut contact does not control those P-cell divisions (Goldstein, 1995). Additionally, posterior fragments of P<sub>2</sub> extruded from the eggshell early after formation of P<sub>2</sub> were able to divide unequally (Schierenberg, 1987). However, posterior fragments of P<sub>2</sub> extruded later in the cell cycle did not divide asymmetrically (Schierenberg, 1987). This suggests that the cue for asymmetric division is repositioned away from the posterior during the course of the cell cycle. This is consistent with a model in which EMS signals P<sub>2</sub>, possibly through MES-1, to attract the cortical site that controls asymmetry to the ventral-anterior side of P<sub>2</sub>. Our findings that MES-1 appears only where P<sub>2</sub> contacts EMS revive the possibility that EMS indeed signals P<sub>2</sub>. With knowledge of the timing of appearance and spatial restriction of MES-1, it is important to re-examine the question of whether the asymmetric divisions of P<sub>2</sub> and P<sub>3</sub> occur cell autonomously or are influenced by their EMS/E neighbor.

### MES-1 localization is affected by defects in embryonic polarity and correlates with P granules

The aberrant pattern of MES-1 seen in mutant embryos with polarity defects suggests that MES-1 localization requires correct embryonic organization, which is not surprising. However, some results were unexpected, in particular observing that certain *par* mutants show normal patterns of MES-1 and observing that most mutants that show altered patterns of MES-1 at later stages show a wild-type pattern early on. There is a general correlation between the severity and stage of MES-1 mislocalization and the severity and stage of P-granule mis-segregation in the various mutants. *par-1*, *par-3* and *par-4* embryos generally mis-segregate P granules during the first division and lack detectable MES-1 staining, whereas *par-2*, *let-99*, *pos-1* and *mex-1* generally segregate P granules correctly during the first division and generally show a normal MES-1 distribution early and then defective distributions later. Early P-granule mis-segregation is probably indicative of severe disruption of polarity, which in turn is likely to impair the cytoskeletal or cortical system that mediates correct localization of MES-1.

A further correlation between MES-1 and P granules was observed in those mutants that displayed wild-type or ectopic MES-1 distributions. In wild-type embryos, the cells that have MES-1 on their surface (P<sub>2</sub>, P<sub>3</sub> and P<sub>4</sub>) always contain P granules. Similarly, in mutant embryos, cells that appeared to have MES-1 on their surface were almost always observed to contain P granules. These observations are consistent with P-granule segregation being directed by MES-1 toward the region of the cell where it is located. However, the converse was not necessarily true: cells containing P granules did not always display MES-1 on their surface. The presence of P granules in

cells that did not exhibit MES-1 may simply be the result of mis-segregation prior to the stages when MES-1 is present. The close physical association between MES-1 and one centrosome of the spindle observed in wild-type embryos was also observed in mutant embryos that exhibited ectopic MES-1. The correlation in these mutant embryos was not absolute, but this may be a consequence of our inability to assign which cell actually contains MES-1.

### MES-1 may be needed to maintain germline-gut contact

Since P<sub>0</sub> and P<sub>1</sub> already have in place a mechanism for asymmetric divisions, why is a distinct P<sub>2</sub>/P<sub>3</sub>-specific mechanism needed? The answer probably relates to the phenomenon of polarity reversal and the hypothesis that germline cells need to be in contact with the gut for proper development. In wild-type embryos that have been released from the constraints of the eggshell, the P daughter of both P<sub>0</sub> and P<sub>1</sub> is formed to the posterior of its somatic sister. Then a switch occurs, termed polarity reversal, and the P daughter of both P<sub>2</sub> and P<sub>3</sub> is formed to the anterior of its somatic sister (Schierenberg, 1987). Had the divisions that produce the P cells to the posterior continued in P<sub>2</sub> and P<sub>3</sub>, the germline cells P<sub>3</sub> and P<sub>4</sub> would have been separated from the gut. Thus, polarity reversal offers a mechanism to maintain contact between the germline and gut cells. Two observations suggest that MES-1 is involved in polarity reversal. First, it is localized in the proper place at the proper time to play a role. Second, *mes-1* mutant embryos released from the constraints of the eggshell do not display polarity reversal (E. Schierenberg, personal communication).

Contact between the germline and gut is observed in many species. Embryos of the nematode *Acrobeloides nanus* (formally named *Cephalobus* sp.; Wiegner and Schierenberg, 1998) undergo the same P<sub>0</sub> and P<sub>1</sub> division patterns as *C. elegans* but then do not display a reversal of polarity during the divisions of P<sub>2</sub> and P<sub>3</sub> (Skiba and Schierenberg, 1992), resulting in all four P cells being formed to the posterior of their somatic sisters. This causes P<sub>3</sub> and P<sub>4</sub> to be separated from the gut cells. Intriguingly, just prior to gastrulation, cell migrations result in P<sub>4</sub> becoming positioned next to E, thereby re-establishing contact between the germline and gut. Since MES-1 is proposed to function in polarity reversal in *C. elegans*, it is predicted that *A. nanus*, which lacks reversal, would either lack MES-1 or use it for another purpose. In many other species, such as *Drosophila*, *Xenopus* and mice, primordial germ cells associate with the hindgut (Wylie, 1999). These examples suggest that germline-gut contact is a common feature and is likely to be required for normal germline development.

An association between the gut and germ cells may guide germ-cell ingression during gastrulation. In *C. elegans*, the two gut cells (Ea and Ep) are the first cells to migrate inward during gastrulation. P<sub>4</sub> follows them into the interior of the embryo (Sulston et al., 1983). P<sub>4</sub> does not migrate inward in embryos in which migration of the two E cells has been inhibited (Schierenberg and Junkersdorf, 1992; Powell-Coffman et al., 1996). Similar events occur in *Drosophila*, where the primordial germ cells (PGCs) first travel passively to the hindgut during gastrulation and then actively migrate through the hindgut to the gonad (Jaglarz and Howard, 1994). Analysis

of *Drosophila* PGC behavior in mutants that affect the gut suggests that the timing and direction of PGC migration out of the gut lumen depends upon developmental changes in the gut epithelium (Warrior, 1994; Jaglarz and Howard, 1995). Another role for the germline-gut contact in *C. elegans* is suggested by the observation of Sulston et al. (1983) that during late embryogenesis Z2 and Z3 project lobes into two cells of the gut, possibly receiving nourishment from this attachment.

We thank Alan Coulson for cosmid; the Genome Sequencing Centers and John Speith for sequence information; Mark Parker for assistance with sequencing; Ahna Skop for advice on blastomere isolation; and John White, Kevin O'Connell, and Ahna Skop for helpful comments on the manuscript. Some strains were provided by the *Caenorhabditis* Genetics Center, which is funded by the NIH National Center for Research Resources. This work was supported by NIH Postdoctoral Fellowship GM14599 to L. A. B., NSF grant IBN-9630952 to S. S. and L. A. B., and NIH grant GM34059 to S. S.

### REFERENCES

- Barstead, R. J. and Waterston, R. (1989). The basal component of the nematode dense-body is vinculin. *J. Biol. Chem.* **264**, 10177-10185.
- Basham, S. E. and Rose, L. S. (1999). Mutations in *ooc-5* and *ooc-3* disrupt oocyte formation and the reestablishment of asymmetric PAR protein localization in two-cell *Caenorhabditis elegans* embryos. *Dev. Biol.* **215**, 253-263.
- Beanan, M. and Strome, S. (1992). Characterization of a germ-line proliferation mutation in *C. elegans*. *Development* **116**, 755-766.
- Boyd, L., Guo, S., Levitan, D., Stinchcomb, D. T. and Kemphues, K. J. (1996). PAR-2 is asymmetrically distributed and promotes association of P granules and PAR-1 with the cortex in *C. elegans* embryos. *Development* **122**, 3075-3084.
- Brenner, S. (1974). The genetics of *Caenorhabditis elegans*. *Genetics* **77**, 71-94.
- Browning, H., Berkowitz, L., Madej, C., Paulsen, J. E., Zolan, M. E. and Strome, S. (1996). Macrorestriction analysis of *Caenorhabditis elegans* genomic DNA. *Genetics* **144**, 609-619.
- Brüchner, K. and Klein, R. (1998). Signalling by Eph receptors and their ephrin ligands. *Curr. Opin. Neurobiol.* **8**, 375-382.
- Cabib, E., Drgonová, J. and Drgon, T. (1998). Role of small G proteins in yeast cell polarization and wall biosynthesis. *Annu. Rev. Biochem.* **67**, 307-333.
- Capowski, E., Martin, E., Garvin, C. and Strome, S. (1991). Identification of grandchildless loci whose products are required for normal germ-line development in the nematode *C. elegans*. *Genetics* **129**, 1061-1072.
- Deppe, U., Schierenberg, E., Cole, T., Krieg, C., Schmitt, D., Yoder B. and van Ehrenstein, G. (1978). Cell lineages of the embryo of the nematode *Caenorhabditis elegans*. *Proc. Nat. Acad. Sci. USA* **75**, 376-380.
- Drubin, D. G. and Nelson, W. J. (1996). Origins of cell polarity. *Cell* **84**, 335-344.
- Etemad-Moghadam, B., Guo, S. and Kemphues, K. J. (1995). Asymmetrically distributed PAR-3 protein contributes to cell polarity and spindle alignment in early *C. elegans* embryos. *Cell* **83**, 743-752.
- Evans, D., Zorio, D., MacMorris, M., Winter, C. E., Lea, K. and Blumenthal, T. (1997). Operons and SL2 trans-splicing exist in nematodes outside the genus *Caenorhabditis*. *Proc. Natl. Acad. Sci. USA* **94**, 9751-9756.
- Faux, M. C. and Scott, J. D. (1996). Molecular glue:kinase anchoring and scaffold proteins. *Cell* **85**, 9-12.
- Fire, A., Xu, S., Montgomery, M. K., Kostas, S. A., Driver, S. E. and Mello, C. C. (1998). Potent and specific genetic interference by double-stranded RNA in *Caenorhabditis elegans*. *Nature* **391**, 806-811.
- Goldstein, B. (1995). Cell contacts orient some cell division axes in the *Caenorhabditis elegans* embryo. *J. Cell. Biol.* **129**, 1071-1080.
- Goldstein, B. and Hird, S. N. (1996). Specification of the antero-posterior axis in *C. elegans*. *Development* **122**, 1467-1474.
- Guo, S. and Kemphues, K. J. (1995). *par-1*, a gene required for establishing



- polarity in *C. elegans* embryos, encodes a putative ser/thr kinase that is asymmetrically distributed. *Cell* **81**, 611-620.
- Guo, S. and Kemphues, K. J.** (1996). A non-muscle myosin required for embryonic polarity in *Caenorhabditis elegans*. *Nature* **382**, 455-458.
- Hanks, S.K. and Quinn, A.M.** (1991). Protein kinase catalytic domain sequence database: identification of conserved features of primary structure and classification of family members. In *Methods Enzymology* (ed. T. Hunter and B. M. Sefton), pp. 38-62, San Diego: Academic Press.
- Hawkins, N. and Garriga, G.** (1998). Asymmetric cell division: from A to Z. *Genes Dev.* **12**, 3625-3638.
- Hill, D. P. and Strome, S.** (1988). An analysis of the role of microfilaments in the establishment and maintenance of asymmetry in *Caenorhabditis elegans* zygotes. *Dev. Biol.* **125**, 75-84.
- Hill, D. and Strome, S.** (1990). Brief cytochalasin-induced disruption of microfilaments during a critical interval in one-cell *C. elegans* embryos alters the partitioning of development instructions to the two-cell embryo. *Development* **108**, 159-172.
- Hird, S. N., Paulsen, J. E. and Strome, S.** (1996). Segregation of P granules in living *Caenorhabditis elegans* embryos: cell-type-specific mechanisms for cytoplasmic localization. *Development* **122**, 1303-1312.
- Holdeman, R., Nehrt, S. and Strome, S.** (1998). MES-2, a maternal protein essential for viability of the germline in *Caenorhabditis elegans*, is homologous to a *Drosophila* Polycomb group protein. *Development* **125**, 2457-2467.
- Jaglarz, M.K. and Howard, K. R.** (1994). The active migration of *Drosophila* primordial germ cells. *Development* **121**, 3495-3503.
- Jaglarz, M.K. and Howard, K. R.** (1995). Primordial germ cell migration in *Drosophila melanogaster* is controlled by somatic tissue. *Development* **120**, 83-89.
- Jan, Y.-N. and Jan, L. Y.** (2000). Polarity in cell division: what frames thy fearful asymmetry? *Cell* **100**, 599-602.
- Kawasaki, I., Shim, Y.-H., J. Kirchner, J., Kaminker, J., Wood, W. B. and Strome, S.** (1998). PGL-1, a predicted RNA-binding component of germ granules, is essential for fertility in *C. elegans*. *Cell* **94**, 635-645.
- Kemphues, K. J., Priess, J. R., Morton, D. G. and Cheng, N.** (1988). Identification of genes required for cytoplasmic localization in early *C. elegans* embryos. *Cell* **52**, 311-320.
- Kemphues, K. J. and Strome, S.** (1997). Fertilization and establishment of polarity in the embryo. In *C. ELEGANS II* (eds D.L. Riddle, T. Blumenthal, B.J. Meyer and J.R. Priess), pp. 335-359, Cold Spring Harbor, NY: Cold Spring Harbor Laboratory Press.
- Korf, I., Fan, Y. and Strome, S.** (1998). The Polycomb group in *Caenorhabditis elegans* and maternal control of germline development. *Development* **125**, 2469-2478.
- Kraut, R., Chia, W., Jan, L. Y., Jan, Y. N. and Knoblich, J. A.** (1996). Role of inscuteable in orienting asymmetric cell divisions in *Drosophila*. *Nature* **383**, 50-55.
- Lee, L., Klee, S. K., Evangelista, M., Boone, C. and Pellman, D.** (1999). Control of mitotic spindle position by the *Saccharomyces cerevisiae* formin Bni1p. *J. Cell Biol.* **144**, 947-961.
- Lin, R., Leone, J. W., Cook, R. G. and Allis, C. D.** (1989). Antibodies specific to acetylated histones document the existence of deposition- and transcription-related histone acetylation in *Tetrahymena*. *J. Cell. Biol.* **108**, 1577-1588.
- Lin, R., Thompson, S. and Priess, J. R.** (1995). *pop-1* encodes an HMG box protein required for the specification of a mesoderm precursor in early *C. elegans* embryos. *Cell* **83**, 599-609.
- Madden, K. and Snyder, M.** (1998). Cell polarity and morphogenesis in budding yeast. *Annu. Rev. Microbiol.* **52**, 687-744.
- Mello, C. C., Kramer, J. M., Stinchcomb, D. and Ambros, V.** (1991). Efficient gene transfer in *C. elegans*: extrachromosomal maintenance and integration of transforming sequences. *EMBO J.* **10**, 3959-3970.
- Mello, C. C., Draper, B. W., Krause, M., Weintraub, H. and Priess, J.** (1992). The *pie-1* and *mex-1* genes and maternal control of blastomere identity in early *C. elegans* embryos. *Cell* **70**, 163-176.
- Olmsted, J. B.** (1986). Analysis of cytoskeletal structures using blot-purified monospecific antibodies. In *Methods In Enzymology*, (ed. R.B. Vallee), pp. 467-472. Orlando, FL: Academic Press.
- Pawson, T.** (1995). Protein modules and signaling networks. *Nature* **373**, 573-580.
- Pawson, T. and Scott, J. D.** (1997). Signaling through scaffold, anchoring and adaptor proteins. *Science* **278**, 2075-2080.
- Pichler, S., Goczny, P., Schnabel, H., Poznanski, A., Ashford, A., Schnabel, R. and Hyman, A. A.** (2000). *ooc-3*, a novel putative transmembrane protein required for establishment of cortical domains and spindle orientation in the P1 blastomere of *C. elegans* embryos. *Development*, **127**, 2063-2073.
- Pinkas-Kramarski, R., Soussan, L., Waterman, H., Levkowitz, G., Alroy, I., Klapper, L., Lavi, S., Seger, R., Ratzkin, B. J., Sela, M. and Yarden, Y.** (1996). Diversification of Neu differentiation factor and epidermal growth factor signalling combinatorial receptor interactions. *EMBO J.* **15**, 2452-2467.
- Powell-Coffman, J.A., Knight, J. and Wood, W. B.** (1996). Onset of *C. elegans* gastrulation is blocked by inhibition of embryonic transcription with an RNA polymerase antisense RNA. *Dev. Biol.* **178**, 472-483.
- Qian, X., Decker, S. J. and Greene, M. I.** (1992). p185<sup>c-neu</sup> and epidermal growth factor receptor associate into a structure composed of activated kinases. *Proc. Nat. Acad. Sci. USA* **89**, 1330-1334.
- Qian, X., Levea, C. M., Freeman, J. K., Dougall, W. C. and Greene, M. I.** (1994). Heterodimerization of epidermal growth factor receptor and wild-type or kinase-deficient neu: a mechanism of interreceptor kinase activation and transphosphorylation. *Proc. Nat. Acad. Sci. USA* **91**, 1500-1504.
- Rocheleau, C. E., Downs, W. D., Lin, R., Wittmann, C., Bei, Y., Cha, Y.-H., Ali, M., Priess, J. and Mello, C. C.** (1997). Wnt signalling and an APC-related gene specify endoderm in early *C. elegans* embryos. *Cell* **90**, 707-716.
- Rose, L. S. and Kemphues, K.** (1998). The *let-99* gene is required for proper spindle orientation during cleavage of the *C. elegans* embryo. *Development* **125**, 1337-1346.
- Sambrook, J.E., Fritsch, E. F. and T. Maniatis.** (1989). *Molecular Cloning: A Laboratory Manual*. 2nd edn, Cold Spring Harbor, NY: Cold Spring Harbor Laboratory Press.
- Schierenberg, E.** (1987). Reversal of cellular polarity and early cell-cell interaction in the embryo of *Caenorhabditis elegans*. *Dev. Biol.* **122**, 452-463.
- Schierenberg, E. and Junkersdorf, B.** (1992). The role of eggshell and underlying vitelline membrane for normal pattern formation in the early *C. elegans* embryo. *Roux's Arch. Dev. Biol.* **202**, 17-22.
- Schweisguth, F.** (2000). Cell polarity: fixing cell polarity with Pins. *Curr. Biol.* **10**, R265-R267.
- Schnabel, R., Weigner, C., Hutter, H., Feichtinger, R. and Schnabel, H.** (1996). *mex-1* and the general partitioning of cell fate in the early *C. elegans* embryo. *Mech. Dev.* **54**, 133-147.
- Seydoux, G., Mello, C. C., Pettitt, J., Wood, W. B., Priess, J. R. and Fire, A.** (1996). Repression of gene expression in the embryonic germ lineage of *C. elegans*. *Nature* **382**, 713-716.
- Shelton, C.A. and Bowerman, B.** (1996). Time-dependent responses to *glp-1*-mediated inductions in early *C. elegans* embryos. *Development* **122**, 2043-2050.
- Shelton, C. A., Carter, J. C., Ellis, G. C. and Bowerman, B.** (1999). The nonmuscle myosin regulatory light chain gene *mlc-4* is required for cytokinesis, anterior-posterior polarity, and body morphology during *Caenorhabditis elegans* embryogenesis. *J. Cell. Biol.* **146**, 439-451.
- Shulman, J. M., Benton, R. and St Johnston, D.** (2000). The *Drosophila* homolog of *C. elegans* PAR-1 organizes the oocyte cytoskeleton and directs oskar mRNA localization to the posterior pole. *Cell* **101**, 377-388.
- Skiba, F. and Schierenberg, E.** (1992). Cell lineages, developmental timing, and spatial pattern formation of free-living soil nematodes. *Dev. Biol.* **151**, 597-610.
- Spieth, J., Brooke, G., Kuersten, S., Lea, K. and Blumenthal, T.** (1993). Operons of *C. elegans*: polycistronic mRNA precursors are processed by trans-splicing of SL2 to downstream coding regions. *Cell* **73**, 521-532.
- Stearns, T.** (1997). Motoring to the finish: kinesin and dynein work together to orient the yeast mitotic spindle. *J. Cell Biol.* **138**, 957-960.
- Strome, S. and Wood, W. B.** (1982). Immunofluorescence visualization of germ-line-specific cytoplasmic granules in embryos, larvae, and adults of *Caenorhabditis elegans*. *Proc. Natl. Acad. Sci. USA* **79**, 1558-1562.
- Strome, S. and Wood, W. B.** (1983). Generation of asymmetry and segregation of germ-line granules in early *Caenorhabditis elegans* embryos. *Cell* **35**, 15-25.
- Strome, S., Martin, P., Schierenberg, E. and Paulsen, J.** (1995). Transformation of the germ line into muscle in *mes-1* mutant embryos of *C. elegans*. *Development* **121**, 2961-2972.
- Sulston, J. E., Schierenberg, E., White, J. G. and Thomson, J. N.** (1983). The embryonic cell lineage of the nematode *Caenorhabditis elegans*. *Dev. Biol.* **100**, 64-119.
- Tabara, H., Hill, R. J., Mello, C. C., Priess, J. R. and Kohara, Y.** (1999). *pos-1* encodes a cytoplasmic zinc-finger protein essential for germline specification in *C. elegans*. *Development* **126**, 1-11.

- Thaler, C. D. and Haimo, L. T.** (1996). Microtubules and microtubule motors: mechanisms of regulation. *Int. Rev. Cytol.* **164**, 269-327.
- Thorpe, C. J., Schlesinger, A., Carter, J. C. and Bowerman, B.** (1997). Wnt signaling polarizes an early *C. elegans* blastomere to distinguish endoderm from mesoderm. *Cell* **90**, 695-705.
- Van Der Greer, P., Hunter, T. and Lindberg, R. A.** (1994). Receptor protein-kinases and their signal transduction pathways. *Annu. Rev. Cell Biol.* **10**, 251-337.
- Wada, T., Qian, X. and Greene, M. I.** (1990). Intermolecular association of the p185neu protein and EGF receptor modulates EGF receptor function. *Cell* **61**, 1339-1347.
- Watts, J. L., Etemad-Moghadam, B., Guo, S., Boyd, L., Draper, B. W., Mello, C. C., Priess, J. R. and Kemphues, K. J.** (1996). *par-6*, a gene involved in the establishment of asymmetry in early *C. elegans* embryos, mediates the symmetric localization of PAR-3. *Development* **122**, 3133-3140.
- Warrior, R.** (1994). Primordial germ cell migration and the assembly of the *Drosophila* embryonic gonad. *Dev. Biol.* **166**, 180-194.
- Wiegner, O. and Schrienberg, S.** (1998). Specification of gut cell fate differs significantly between the nematodes *Acrobeloides nanus* and *Caenorhabditis elegans*. *Dev. Biol.* **204**, 3-14.
- Wylie, C.** (1999). Germ cells. *Cell* **96**, 165-174.
